# Supplementary material
Source: PubMed Central journal article supplement (PMC9057450)
Supplement: NIHMS1797105-supplement-1.pdf [file NIHMS1797105-supplement-1.pdf]

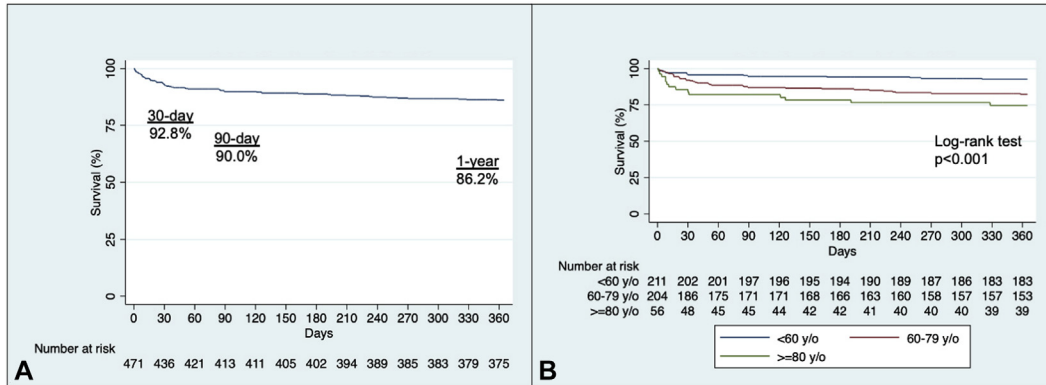

**Figure 1.** Kaplan-Meier analysis of postoperative mortality in (A) all patients with acute incisional hernia incarceration and (B) in patients stratified by age.

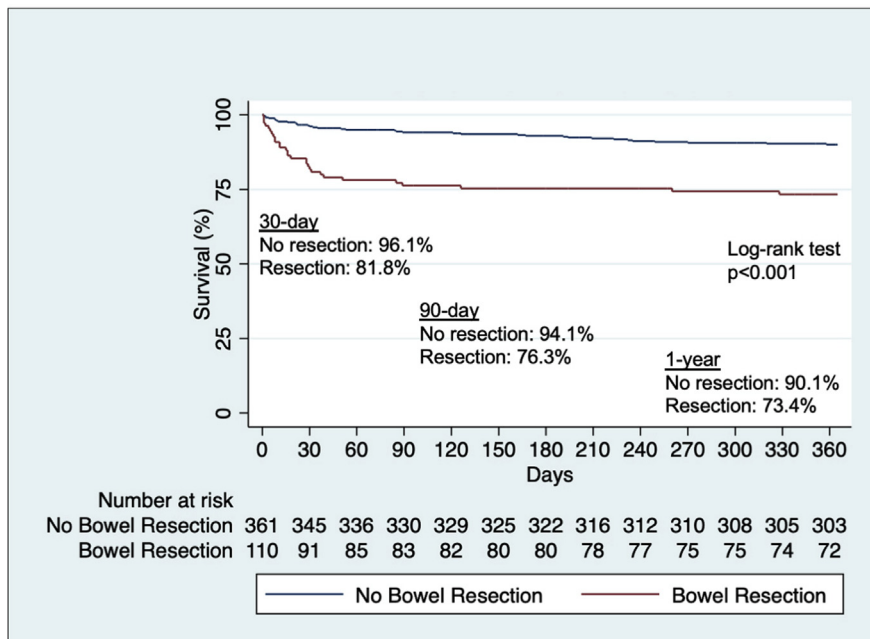

**Figure 2.** Kaplan-Meier analysis of postoperative mortality in patients with acute incisional hernia incarceration, stratified by the need for bowel resection.

**eTable 1.** Univariate Analysis of the Need for Bowel Resection (Baseline and Perioperative Characteristics)

| Characteristic                               | No bowel resection (n = 371) | Bowel resection (n = 112) | p Value |
|----------------------------------------------|------------------------------|---------------------------|---------|
| Baseline                                     |                              |                           |         |
| Patient                                      |                              |                           |         |
| Age, y, mean (SD)                            | 61.7 (14.9)                  | 64.2 (13.7)               | 0.12    |
| Female sex, n (%)                            | 280 (75.5)                   | 73 (65.2)                 | 0.031   |
| Race/ethnicity, n (%)                        |                              |                           | 0.54    |
| Caucasian                                    | 316 (85.2)                   | 96 (85.7)                 |         |
| Black                                        | 51 (13.8)                    | 16 (14.3)                 |         |
| Hispanic                                     | 4 (1.1)                      | 0                         |         |
| BMI, kg/m <sup>2</sup> , mean (SD)           | 38.1 (10.5)                  | 35.5 (9.7)                | 0.012   |
| Smoking status, n (%)                        |                              |                           | 0.92    |
| Never                                        | 131 (35.3)                   | 42 (37.5)                 |         |
| Current                                      | 110 (29.7)                   | 34 (30.4)                 |         |
| Former                                       | 112 (30.2)                   | 32 (28.6)                 |         |
| Unspecified                                  | 18 (4.9)                     | 4 (3.6)                   |         |
| Hernia, n (%)                                |                              |                           |         |
| Symptoms                                     | 219 (59.0)                   | 59 (52.7)                 | 0.23    |
| Incision type                                |                              |                           | 0.20    |
| Midline                                      | 253 (68.2)                   | 82 (73.2)                 |         |
| Pfannenstiel                                 | 21 (5.7)                     | 5 (4.46)                  |         |
| Laparoscopic                                 | 64 (17.3)                    | 16 (14.3)                 |         |
| Old stoma                                    | 17 (4.6)                     | 7 (6.3)                   |         |
| Chevron                                      | 2 (0.5)                      | 2 (1.8)                   |         |
| Other                                        | 14 (3.8)                     | 0                         |         |
| Earlier hernia repair                        | 112 (30.2)                   | 47 (42.3)                 | 0.017   |
| Earlier mesh placement                       | 58 (15.6)                    | 24 (21.6)                 | 0.14    |
| Comorbidity, n (%)                           |                              |                           |         |
| COPD                                         | 65 (17.5)                    | 23 (20.5)                 | 0.47    |
| End-stage renal disease                      | 13 (3.5)                     | 8 (7.1)                   | 0.098   |
| Cirrhosis                                    | 19 (5.1)                     | 9 (8.0)                   | 0.25    |
| Diabetes                                     | 134 (36.1)                   | 44 (39.3)                 | 0.54    |
| Active cancer                                | 29 (7.8)                     | 13 (11.6)                 | 0.21    |
| Immunosuppression                            | 34 (9.2)                     | 10 (8.9)                  | 0.94    |
| Perioperative                                |                              |                           |         |
| Vital sign, mean (SD)                        |                              |                           |         |
| Maximum temperature, °C                      | 36.9 (3.2)                   | 36.9 (0.5)                | 0.022   |
| Heart rate, beats/min                        | 86.0 (16.9)                  | 89.9 (17.8)               | 0.074   |
| Mean arterial pressure, mmHg                 | 98.1 (17.5)                  | 97.3 (20.5)               | 0.72    |
| Laboratory values at presentation, mean (SD) |                              |                           |         |
| WBC count, ×10 <sup>3</sup> cells/mL         | 10.4 (5.0)                   | 12.5 (7.2)                | < 0.001 |
| Neutrophil to lymphocyte ratio               | 7.7 (8.6)                    | 28.4 (135.9)              | 0.008   |
| Hematocrit, %                                | 39.0 (6.2)                   | 39.8 (7.3)                | 0.77    |
| Creatinine, mg/dL                            | 1.2 (1.3)                    | 1.6 (1.7)                 | 0.013   |
| Bicarbonate, mEq/L                           | 26.9 (5.3)                   | 25.5 (4.1)                | 0.011   |
| Operative details                            |                              |                           |         |
| ASA classification, mean (SD)                | 3.1 (0.6)                    | 3.4 (0.7)                 | < 0.001 |
| Case duration, min, median (IQR)             | 153 (106–208)                | 186 (140–249)             | < 0.001 |
| Procedure detail, n (%)                      |                              |                           |         |
| Repair with mesh                             | 156 (56.9)                   | 16 (20.0)                 | < 0.001 |

(Continued)

**eTable 1.** Continued

| Characteristic                  | No bowel resection (n = 371) | Bowel resection (n = 112) | p Value |
|---------------------------------|------------------------------|---------------------------|---------|
| Length of stay, d, median (IQR) |                              |                           |         |
| Total                           | 6 (4–9)                      | 10 (7–16)                 | < 0.001 |
| ICU                             | 0 (0–1)                      | 2 (0–6)                   | < 0.001 |
| Disposition, n (%)              |                              |                           |         |
| Home                            | 288 (77.6)                   | 43 (47.3)                 | < 0.001 |
| Facility                        | 74 (20.0)                    | 39 (34.8)                 |         |
| Inpatient death                 | 9 (2.4)                      | 20 (17.9)                 |         |
| Mortality, n (%)                |                              |                           |         |
| 30 d                            | 24 (6.5)                     | 22 (19.6)                 | 0.43    |
| 90 d                            | 31 (8.4)                     | 28 (25.0)                 | 0.100   |
| 1 y                             | 44 (11.9)                    | 31 (27.7)                 | 0.018   |

IQR, interquartile range.

**eTable 2.** Additional Hernia-Related Complications after Acute Incisional Hernia Incarceration

| Variable                            | Incarceration cohort (n = 483) |       |
|-------------------------------------|--------------------------------|-------|
|                                     | n                              | %     |
| Surgical site infection             | 23                             | 4.75  |
| Hernia-related additional operation | 109                            | 22.52 |
| Hernia-related readmission          | 92                             | 19.01 |
| Mesh complication*                  | 20                             | 4.14  |

Data refer to any complication that occurred within the study period.

\*Includes mesh infection, enterocutaneous fistula, and need for mesh explantation.

**eTable 3.** Characteristics of Patients Undergoing Elective Repair and among Those with Acute Incisional Hernia Incarceration

| Variable              | Before matching                    |                                |         | After matching                   |                                |       |
|-----------------------|------------------------------------|--------------------------------|---------|----------------------------------|--------------------------------|-------|
|                       | Elective repair cohort (n = 8,708) | Incarceration cohort (n = 483) | p Value | Elective repair cohort (n = 469) | Incarceration cohort (n = 469) | SMD   |
| Age, y, mean (SD)     | 55.79 (14.08)                      | 62.30 (14.68)                  | < 0.001 | 61.38 (13.28)                    | 61.39 (14.68)                  | 0.001 |
| Sex, n (%)            |                                    |                                | < 0.001 |                                  |                                | 0.021 |
| Male                  | 3,695 (42.43)                      | 130 (26.92)                    |         | 133 (28.36)                      | 137 (29.21)                    |       |
| Female                | 5,013 (57.57)                      | 353 (73.08)                    |         | 336 (71.64)                      | 332 (70.79)                    |       |
| Race/ethnicity, n (%) |                                    |                                | < 0.001 |                                  |                                | 0.014 |
| Caucasian             | 7,895 (90.66)                      | 412 (85.30)                    |         | 415 (88.49)                      | 399 (85.07)                    |       |
| African American      | 641 (7.36)                         | 67 (13.87)                     |         | 44 (9.38)                        | 65 (13.86)                     |       |
| Hispanic              | 22 (0.25)                          | 4 (0.83)                       |         | 1 (0.21)                         | 5 (1.07)                       |       |
| Smoking, n (%)        |                                    |                                | 0.034   |                                  |                                | 0.043 |
| Never                 | 3,036 (34.86)                      | 168 (34.78)                    |         | 164 (34.97)                      | 163 (34.75)                    |       |
| Current               | 2,337 (26.84)                      | 143 (29.61)                    |         | 122 (26.01)                      | 139 (29.64)                    |       |
| Former                | 2,565 (29.46)                      | 146 (30.23)                    |         | 157 (33.48)                      | 144 (30.70)                    |       |
| Unknown               | 770 (8.84)                         | 26 (5.38)                      |         | 26 (5.54)                        | 22 (4.69)                      |       |
| Heart disease, n (%)  | 1,406 (16.15)                      | 185 (38.30)                    | < 0.001 | 183 (39.02)                      | 177 (37.74)                    | 0.024 |
| COPD, n (%)           | 998 (11.46)                        | 144 (29.81)                    | < 0.001 | 140 (29.85)                      | 138 (29.42)                    | 0.007 |
| Diabetes, n (%)       | 1,936 (22.23)                      | 207 (42.86)                    | < 0.001 | 200 (42.64)                      | 199 (42.43)                    | 0.005 |
| ESRD, n (%)           | 108 (1.24)                         | 24 (4.97)                      | < 0.001 | 13 (2.77)                        | 18 (3.84)                      | 0.055 |
| Cirrhosis, n (%)      | 215 (2.47)                         | 29 (6.00)                      | < 0.001 | 26 (5.54)                        | 28 (5.97)                      | 0.021 |

ESRD, end-stage renal disease; SMD, standardized mean difference.
